# Supplementary material for: Effect of asthma management with exhaled nitric oxide versus usual care on perinatal outcomes
Source: PubMed Central journal article supplement — Eur Respir J. 2022 Nov 17;60(5):2200298. doi: 10.1183/13993003.00298-2022 (PMC9669403; doi:10.1183/13993003.00298-2022), 2022-11-17

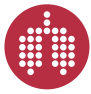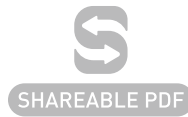

# Effect of asthma management with exhaled nitric oxide *versus* usual care on perinatal outcomes

Vanessa E. Murphy <sup>1,2</sup>, Megan E. Jensen<sup>1,2</sup>, Elizabeth G. Holliday<sup>2</sup>, Warwick B. Giles<sup>3</sup>, Helen L. Barrett<sup>4,5</sup>, Leonie K. Callaway<sup>6,7</sup>, Andrew Bisits<sup>8</sup>, Michael J. Peek<sup>9,10</sup>, Sean K. Seeho<sup>3</sup>, Alistair Abbott<sup>11</sup>, Annelies L. Robijn<sup>1</sup>, Paul B. Colditz<sup>12</sup>, Andrew Searles<sup>13</sup>, John Attia <sup>2</sup>, Kirsten McCaffery<sup>14</sup>, Michael J. Hensley<sup>15</sup>, Joerg Mattes<sup>1,16</sup> and Peter G. Gibson <sup>15,17</sup>

<sup>1</sup>Priority Research Centre Grow Up Well, University of Newcastle, and Hunter Medical Research Institute, Newcastle, Australia. <sup>2</sup>School of Medicine and Public Health, Faculty of Health, University of Newcastle, and Hunter Medical Research Institute, Newcastle, Australia. <sup>3</sup>Specialty of Obstetrics, Gynaecology and Neonatology, Sydney Medical School Northern, University of Sydney, Sydney, Australia. <sup>4</sup>Queensland Diabetes and Endocrine Centre, Mater Health Services, South Brisbane, Australia. <sup>5</sup>Mater Research Institute – The University of Queensland, St Lucia, Australia. <sup>6</sup>School of Medicine, University of Queensland, Brisbane, Australia. <sup>7</sup>Obstetric Medicine, Royal Brisbane and Women’s Hospital, Brisbane, Australia. <sup>8</sup>Birthing Unit, Royal Hospital for Women Randwick, Randwick, Australia. <sup>9</sup>Australian National University Medical School, The Australian National University, Canberra, Australia. <sup>10</sup>Department of Obstetrics and Gynaecology, Centenary Hospital for Women and Children, Canberra, Australia. <sup>11</sup>Nepean Hospital, Kingswood, Australia. <sup>12</sup>Perinatal Research Centre, UQCCR, University of Queensland, Brisbane, Australia. <sup>13</sup>Hunter Medical Research Institute, Newcastle, Australia. <sup>14</sup>School of Public Health, University of Sydney, Sydney, Australia. <sup>15</sup>Department of Respiratory and Sleep Medicine, John Hunter Hospital, Newcastle, Australia. <sup>16</sup>Paediatric Respiratory and Sleep Medicine Department, John Hunter Children’s Hospital, Newcastle, Australia. <sup>17</sup>Priority Research Centre for Healthy Lungs, Hunter Medical Research Institute, University of Newcastle, Newcastle, Australia.

Corresponding author: Vanessa E. Murphy ([vanessa.murphy@newcastle.edu.au](mailto:vanessa.murphy@newcastle.edu.au))

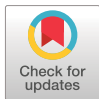

Shareable abstract (@ERSpublications)

**Asthma pharmacotherapy guided by fractional exhaled nitric oxide and delivered by a nurse or midwife in the antenatal clinic setting did not improve perinatal outcomes and there was no significant difference in asthma exacerbations between groups** <https://bit.ly/3LdbJ8V>

**Cite this article as:** Murphy VE, Jensen ME, Holliday EG, *et al.* Effect of asthma management with exhaled nitric oxide *versus* usual care on perinatal outcomes. *Eur Respir J* 2022; 60: 2200298 [DOI: 10.1183/13993003.00298-2022].

This single-page version can be shared freely online.

Copyright ©The authors 2022.

This version is distributed under the terms of the Creative Commons Attribution Non-Commercial Licence 4.0. For commercial reproduction rights and permissions contact [permissions@ersnet.org](mailto:permissions@ersnet.org)

This article has an editorial commentary: <https://doi.org/10.1183/13993003.01639-2022>

Received: 9 Feb 2022  
Accepted: 10 May 2022

## Abstract

**Introduction** Asthma exacerbations in pregnancy are associated with adverse perinatal outcomes. We aimed to determine whether fractional exhaled nitric oxide ( $F_{ENO}$ )-based asthma management improves perinatal outcomes compared to usual care.

**Methods** The Breathing for Life Trial was a multicentre, parallel-group, randomised controlled trial conducted in six hospital antenatal clinics, which compared asthma management guided by  $F_{ENO}$  (adjustment of asthma treatment according to exhaled nitric oxide and symptoms each 6–12 weeks) to usual care (no treatment adjustment as part of the trial). The primary outcome was a composite of adverse perinatal events (preterm birth, small for gestational age (SGA), perinatal mortality or neonatal hospitalisation) assessed using hospital records. Secondary outcomes included maternal asthma exacerbations. Concealed random allocation, stratified by study site and self-reported smoking status was used, with blinded outcome assessment and statistical analysis (intention to treat).

**Results** Pregnant women with current asthma were recruited; 599 to the control group (608 infants) and 601 to the intervention (615 infants). There were no significant group differences for the primary composite perinatal outcome (152 (25.6%) out of 594 control, 177 (29.4%) out of 603 intervention; OR 1.21, 95% CI 0.94–1.56;  $p=0.15$ ), preterm birth (OR 1.14, 95% CI 0.78–1.68), SGA (OR 1.06, 95% CI 0.78–1.68), perinatal mortality (OR 3.62, 95% CI 0.80–16.5), neonatal hospitalisation (OR 1.24, 95% CI 0.89–1.72) or maternal asthma exacerbations requiring hospital admission or emergency department presentation (OR 1.19, 95% CI 0.69–2.05).

**Conclusion**  $F_{ENO}$ -guided asthma pharmacotherapy delivered by a nurse or midwife in the antenatal clinic setting did not improve perinatal outcomes.

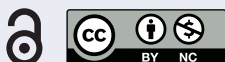

Supplement: ERJ-00298-2022.Shareable.pdf [file ERJ-00298-2022.Shareable.pdf]
